# Supplementary material
Source: publisher figshare collection journal article supplement (https://karger.figshare.com/articles/dataset/_/3990417)
Supplement: Supplementary file 1 [file 1]

## Patient 2: final list of 5 candidate genes

| Gene     | Type     | Variant           |
|----------|----------|-------------------|
| MFHAS1   | Missense | c.C556A:p.L186M   |
| FKBP15   | Missense | c.C913T:p.R305C   |
| SLC22A24 | Missense | c.A113T:p.E38V    |
| FBN1     | Missense | c.C5183T:p.A1728V |
| CA5A     | Missense | c.C388T:p.H130Y   |
