# Supplementary material
Source: publisher figshare collection journal article supplement (https://karger.figshare.com/articles/dataset/_/3990417)
Supplement: Supplementary file 3 [file 1]

## Patient 1: final list of 11 candidate genes

| Gene     | Type                | Variant                  |
|----------|---------------------|--------------------------|
| CENPF    | Missense            | c.G6136A:p.A2046T        |
| UBA7     | Missense            | c.G2825A:p.R942K         |
| SKIV2L   | Missense            | c.G1617A:p.M539I         |
| TAP2     | Missense            | c.C1840T:p.R614C         |
| EVX1     | Missense            | c.G41A:p.G14D            |
| WIPF3    | Missense            | c.A1205G:p.Q402R         |
| MBOAT4   | Nonsense            | c.C553T:p.R185X          |
| SLC22A24 | Missense            | c.T1180A:p.C394S         |
| SCYL2    | Missense            | c.A1940C:p.K647T         |
| FBN1     | Missense            | <b>c.C5183T:p.A1728V</b> |
| C18orf54 | Frameshift deletion | c.493delG:p.E165fs       |
