# Supplementary material
Source: publisher figshare collection journal article supplement (https://karger.figshare.com/articles/dataset/_/3990417)
Supplement: Supplementary file 4 [file 1]

## Exome analysis P1 (Sao Paolo)

52,731  
Total number of variants

18,077  
Present in mother

4,937  
Absent in both brothers

713  
Exonic or splice site variants

422  
Non-synonymous variants

70  
Absent in public databases

11  
Absent in internal database

## Exome analysis P2 (Cincinnati)

60,811  
Total number of variants

21,331  
Absent in mother

297  
Absent in internal database

165  
Absent in public databases

45  
Exonic or splice site variants

30  
Non-synonymous variants

5  
Predicted damaging
