# Supplementary material
Source: publisher figshare collection journal article supplement (https://karger.figshare.com/articles/dataset/_/3990417)

Age (months)

Height

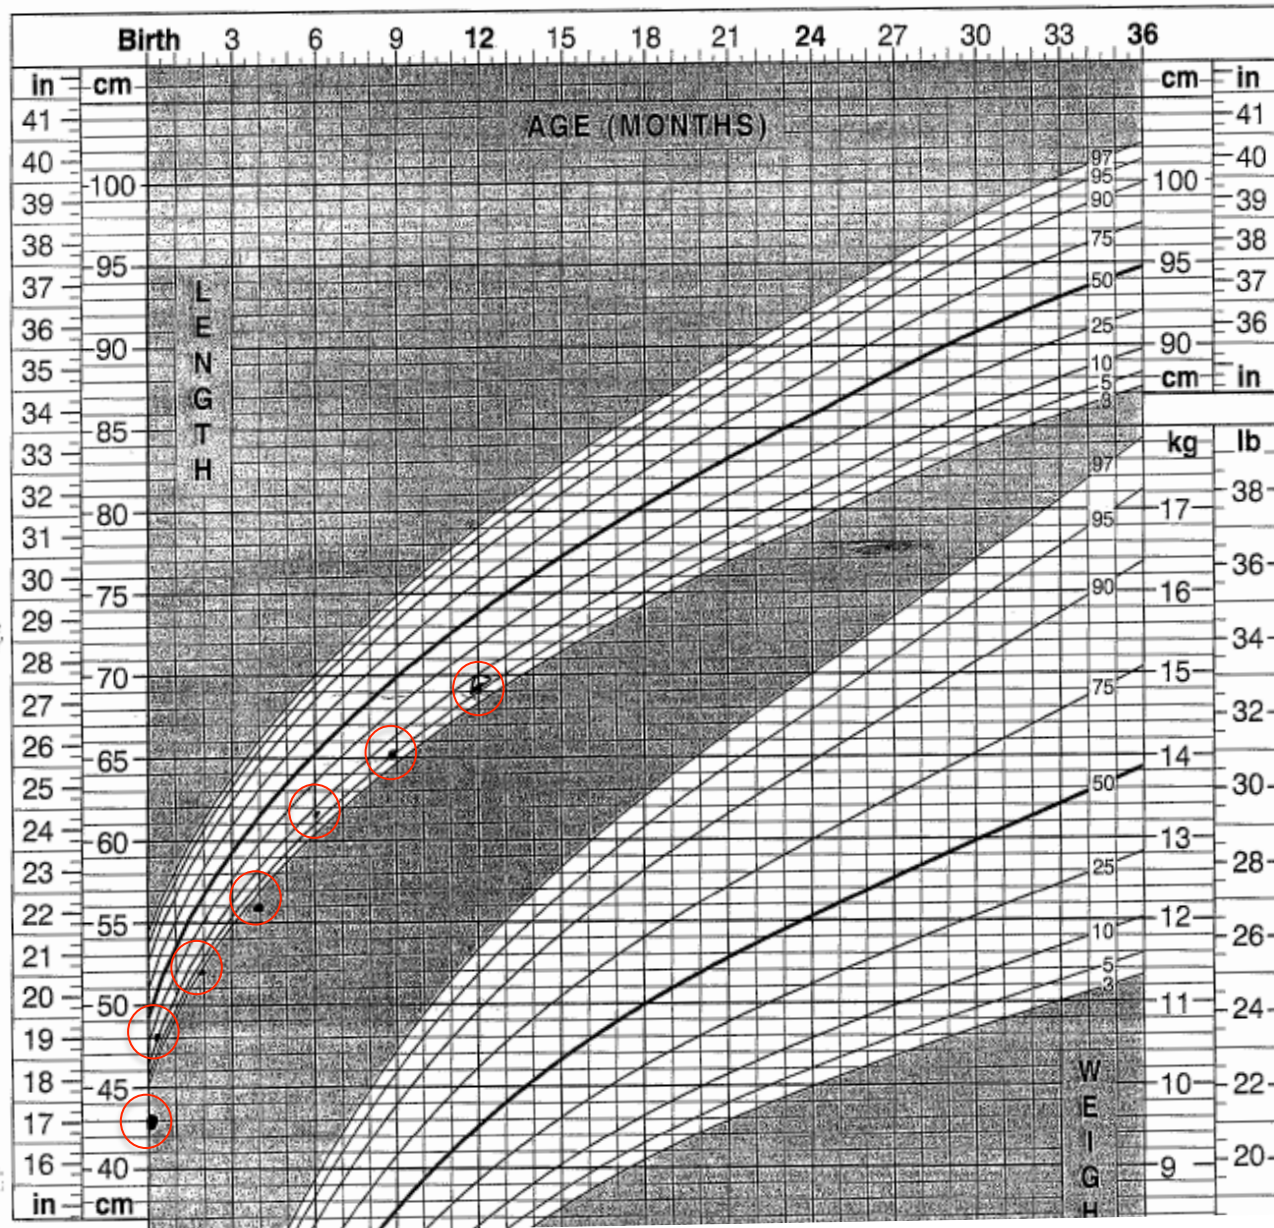

Patient 2 Growth chart 0-12 months

Supplement: Supplementary file 2 [file 1]
